# Supplementary material
Source: publisher figshare collection journal article supplement (https://frontiersin.figshare.com/ndownloader/files/24979943)
Supplement: Supplementary file [file 24979943]

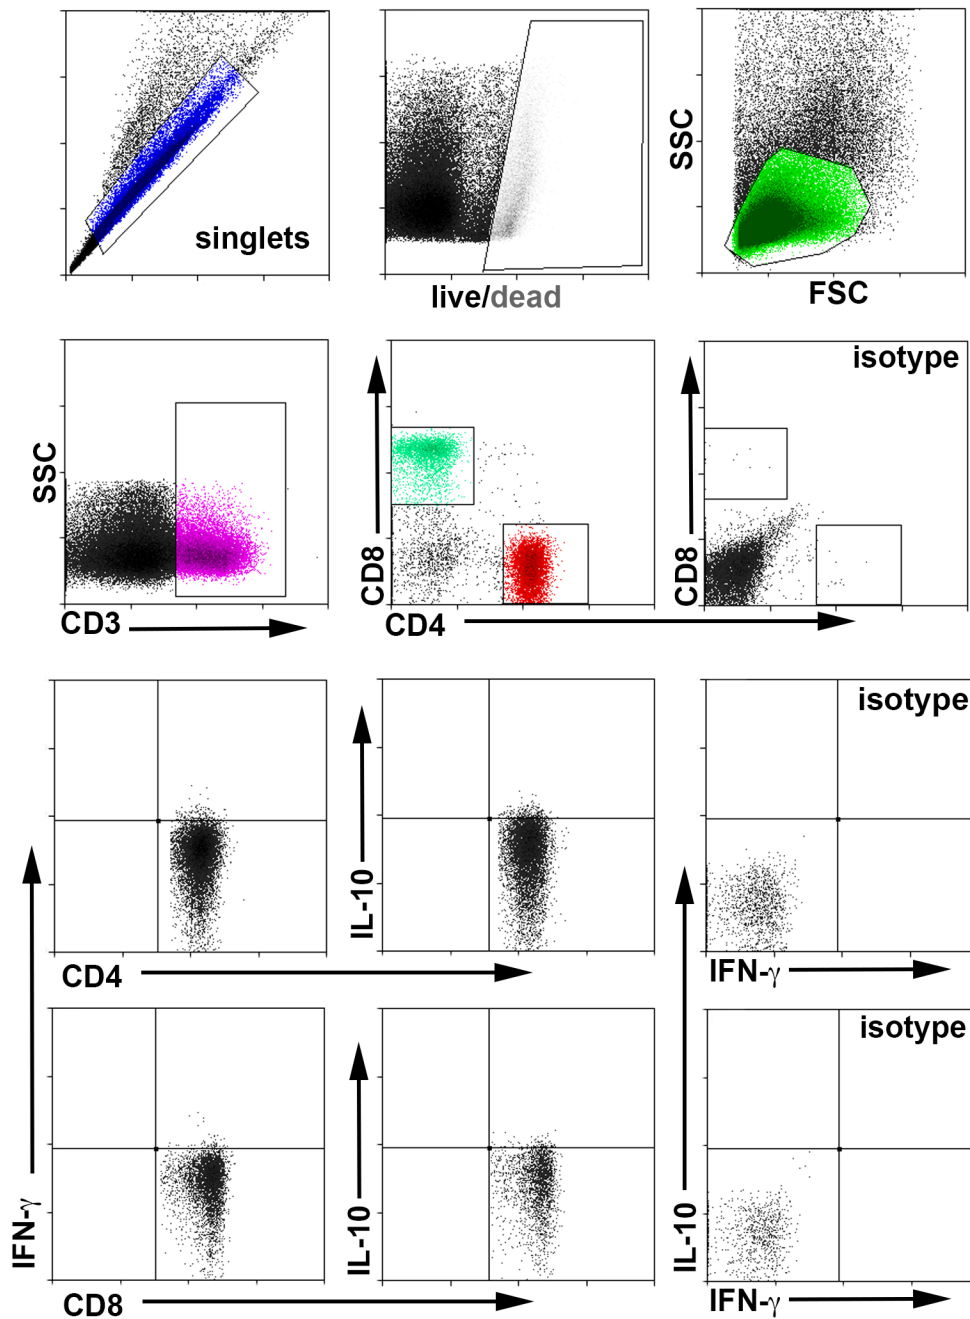

**Supplementary Figure 8: Gating scheme for intracellular cytokine staining.** Splenocytes were incubated in 1x Monensin for 4 hours and processed for intracellular staining. Cell singlets excluding non-viable cells were selected for size and CD3+ T cells selected for CD4 or CD8 expression. CD4+ or CD8+ T cells were then plotted on IFN- $\gamma$  or IL-10. Isotypes were used for reference.
